# Supplementary material for: Distinct heat response molecular mechanisms emerge in cassava vasculature compared to leaf mesophyll tissue under high temperature stress
Source: Front Plant Sci. 2023 Nov 30;14:1281436. doi: 10.3389/fpls.2023.1281436 (PMC10720452; doi:10.3389/fpls.2023.1281436)
Supplement: Supplementary file 2 [file Table_1.xlsx]

## Sheet: Sheet1
Heat stressed cassava QPCR primers
CCOAMT	Manes.03G030500	QF	GCTCCCCTCAAGGAACTCAG
		QR	TGGCTGTAATCTTGCCATCGT
PAL1	Manes.10G047500	QF	ACTGGCTTTGGTGCAACCTC
		QR	TGCAGGAGGGTGTTGATTCTC
4CL	Manes.11G071800	QF	AAGTCACCGGACACCGAAAA
		QR	AAGCACATAGCGAGCACAGG
SERAT	Manes.03G139000	QF	TGCCAAGCCCATAGAGTAGC
		QR	CCAATCACAGCAGTCTCTCCA
CYS	Manes.15G060800	QF	GGGAACAAACCTGTGGCAAT
		QR	TAGCCTTTTCCCTTCAGCTTCC
ASP	Manes.03G061000	QF	CCACTGGCGTTGATCCTACT
		QR	CACCGCCATCAGCAACAAAC
F3H	Manes.02G104700	QF	TCTCGGACTTAAACGCCACA
		QR	TGCTTGGTGGTCTGCATTTCT
CHI	Manes.07G140900	QF	GACGCTCTTATTGCTGCTCC
		QR	CTGCTGCCAATCTATCTCGC
CHS	Manes.11G075500	QF	ACCATCTCTCGATGCTCGTC
		QR	GACAGCGGGATGAAGACCAA
PC	Manes.05G142000	QF	ACGGCTTCTTCAGTCCCAAA
		QR	CCCCGGAAGCTACAGAGAAA
PsaL	Manes.12G055600	QF	ACCAATCAATGGAGACCCCT
		QR	GGACCTGCCTTCACAAATGG
CSK	Manes.13G022900	QF	CAGTTGGACCTCTTTCGCAG
		QR	ATCTGATGCATTGGCTCCAGG
LHCB2	Manes.01G175700	QF	CGCAAGATTGGTTCCTTCGG
		QR	GTCCCATCCATAATCACCGGG
SWEET 17	Manes.15G011300	QF	ATGCACCACTCAAAATGAGGGC
		QR	GCGAGAGGCGAACCATACAT
CYP79	Manes.12G133500	QF	CGACCCAGAAAGGCACTTGA
		QR	GGTGGTTCCAAGCAAAGCAG
CYP71	Manes.12G132900	QF	CATTCAGGAAGCATCCACCAG
		QR	CCATAGCCCAGGCGTTGAC
POD	Manes.12G076300	QF	GGTGTGGTCTCTTGTGCTGA
		QR	GGTGTGGTCTCTTGTGCTGA
Tubulin	Manes.08G061700	QF	GTGGAGGAACTGGTTCTGGA
		QR	TGCACTCATCTGCATTCTCC
